# Supplementary material for: Using median survival in meta-analysis of experimental time-to-event data
Source: Springer Nature journal article supplement (doi:10.1186/s13643-021-01824-0), 2021-11-02

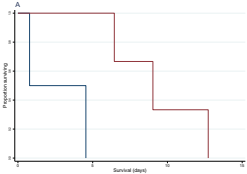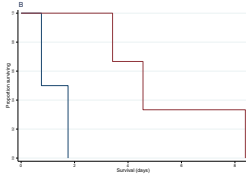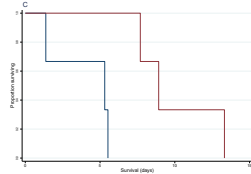

Supplement: MOESM6 [file 19823500]
